# Supplementary material for: Degradable Fe3O4-based nanocomposite for cascade reaction-enhanced anti-tumor therapy
Source: Royal Society of Chemistry journal article supplement (doi:10.1039/d3ra00527e), 2023-01-01
Supplement: d3ra00527e1.pdf [file d3ra00527e1.pdf]

## Degradable Fe<sub>3</sub>O<sub>4</sub>-Based Nanocomposite for Cascade Reaction-Enhanced Anti-Tumor Therapy

Yang Wang,<sup>a,\*</sup> Xun Li,<sup>b,1</sup> Yuan Fang,<sup>a</sup> Jianhua Wang,<sup>a</sup> Danhong Yan,<sup>a</sup> Baisong  
Chang<sup>b,\*</sup>

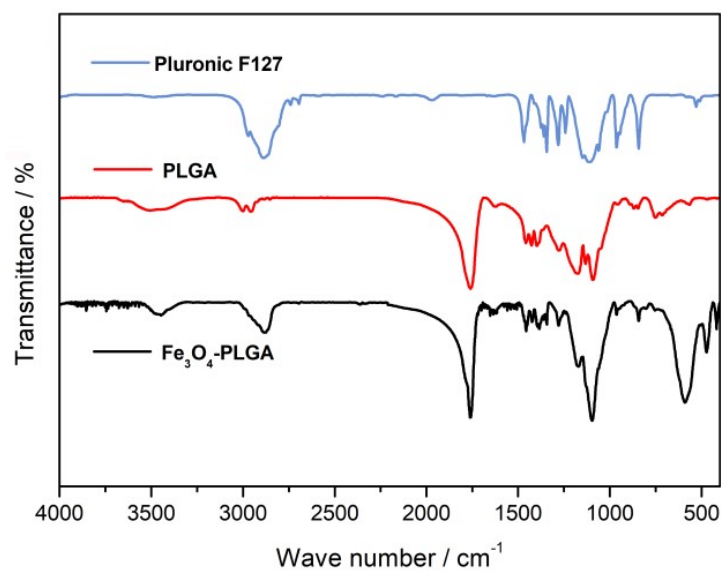

Fig. S1 FTIR spectra of Fe<sub>3</sub>O<sub>4</sub>-PLGA, PLGA and F127

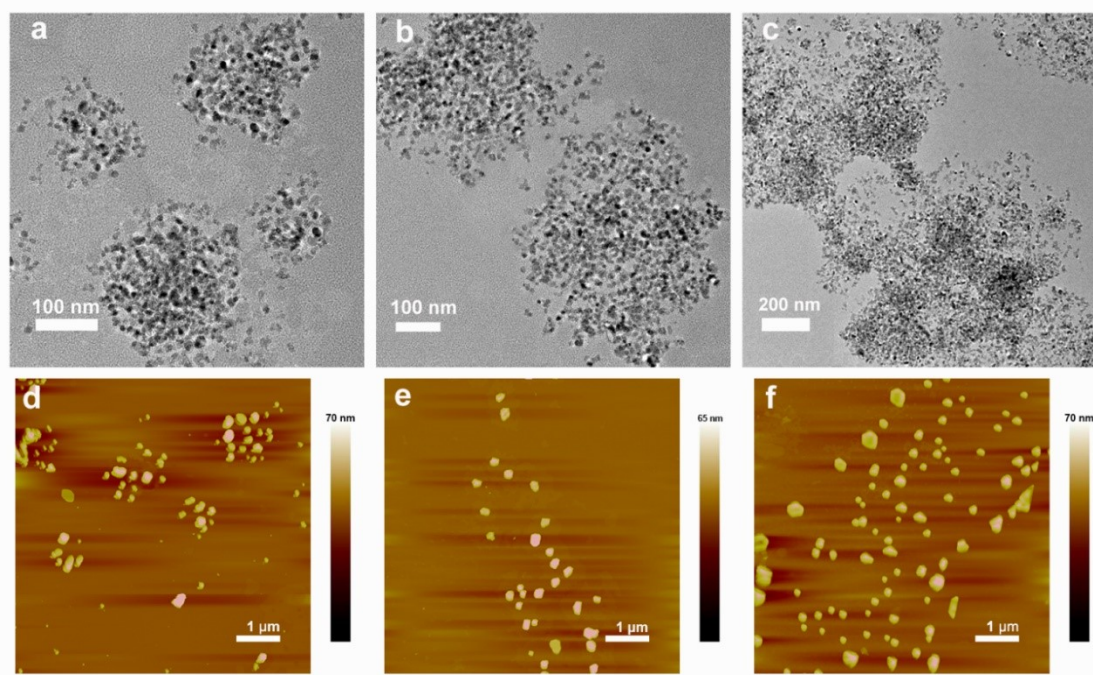

Fig. S2 TEM images (a-c) and AFM images (d-f) of Fe<sub>3</sub>O<sub>4</sub>-PLGA nanocomposites  
with different PLGA/Fe<sub>3</sub>O<sub>4</sub> mass ratio (2:1(a, d), 3:1(b, e) 4:1(c, f))

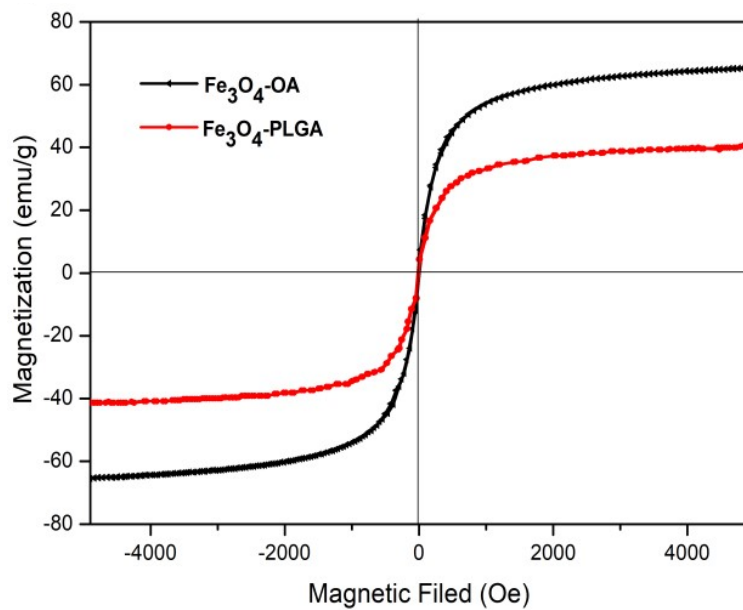

Fig. S3 VSM for Fe<sub>3</sub>O<sub>4</sub>-OA and Fe<sub>3</sub>O<sub>4</sub>-PLGA

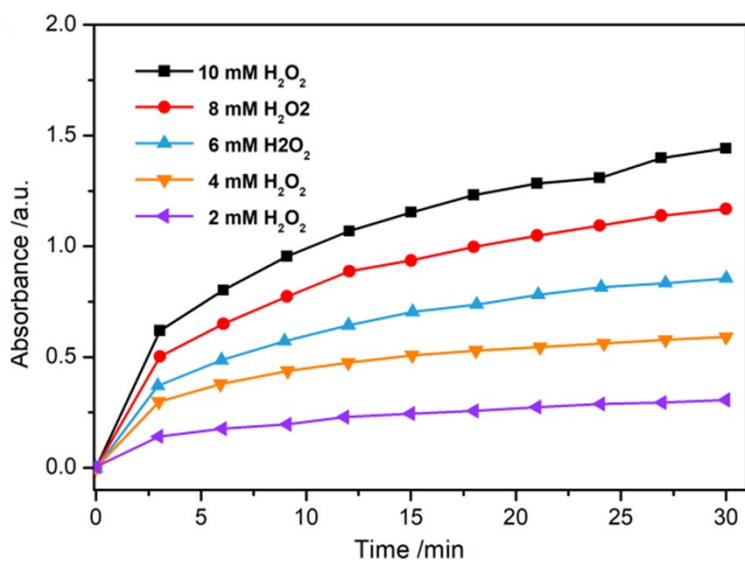

Fig. S4 Time-course absorbance of Fe<sub>3</sub>O<sub>4</sub>-PLGA-H<sub>2</sub>O<sub>2</sub>-TMB systems upon the addition of varied concentrations of H<sub>2</sub>O<sub>2</sub>

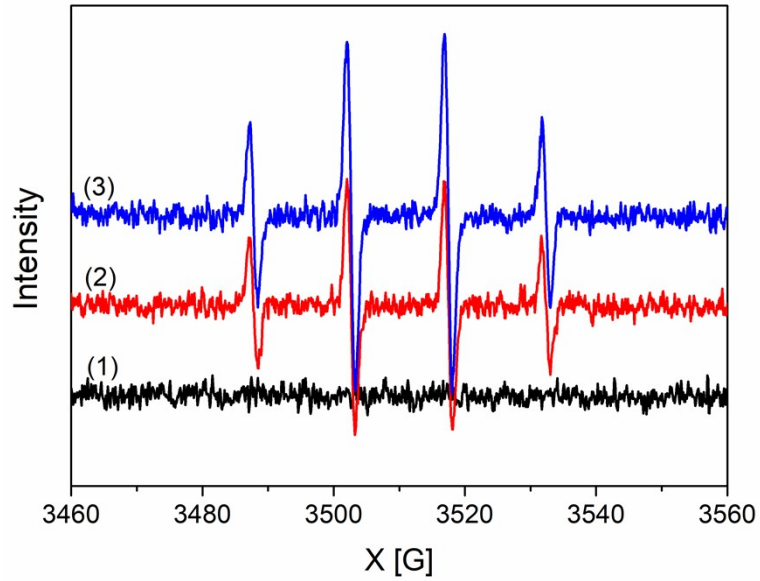

Fig. S5 EPR spectra of  $\bullet\text{OH}$  trapped by DMPO under different conditions: (1) control, (2)  $\text{Fe}_3\text{O}_4$ -PLGA nanocomposite with 10 mM  $\text{H}_2\text{O}_2$  at pH 5.0, (3)  $\text{Fe}_3\text{O}_4$ /GOx-PLGA nanocomposite with 5 mM  $\beta$ -D-glucose at pH 5.0

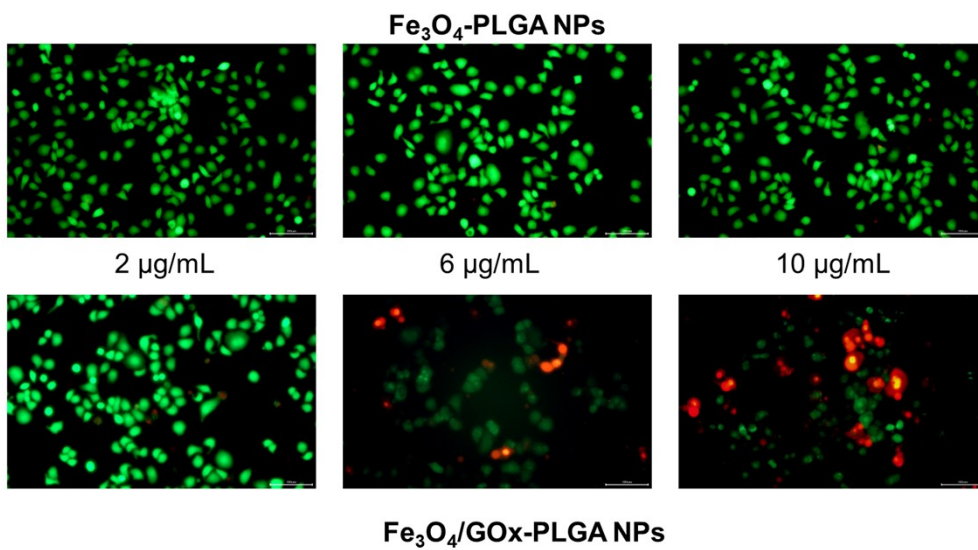

Fig. S6 Fluorescence images of viable and dead cell distributions after separate incubation with  $\text{Fe}_3\text{O}_4$ -PLGA and  $\text{Fe}_3\text{O}_4$ /GOx-PLGA nanocomposites under neutral (pH = 7.4) at varied concentrations for 6 h

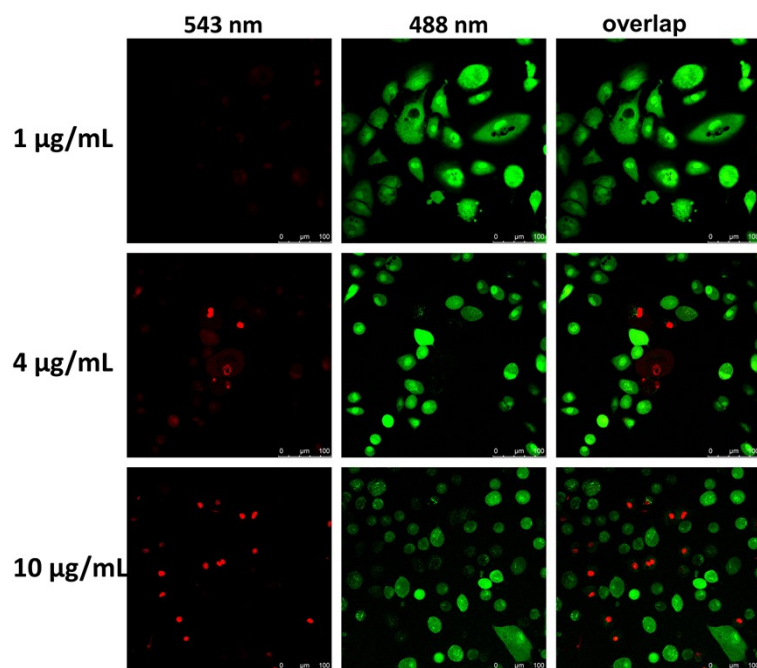

Fig. S7 CLSM images of HeLa cells after co-incubation with  $\text{Fe}_3\text{O}_4/\text{GOx-PLGA}$  nanocomposite under neutral ( $\text{pH} = 7.4$ ) conditions at varied concentrations for 6 h

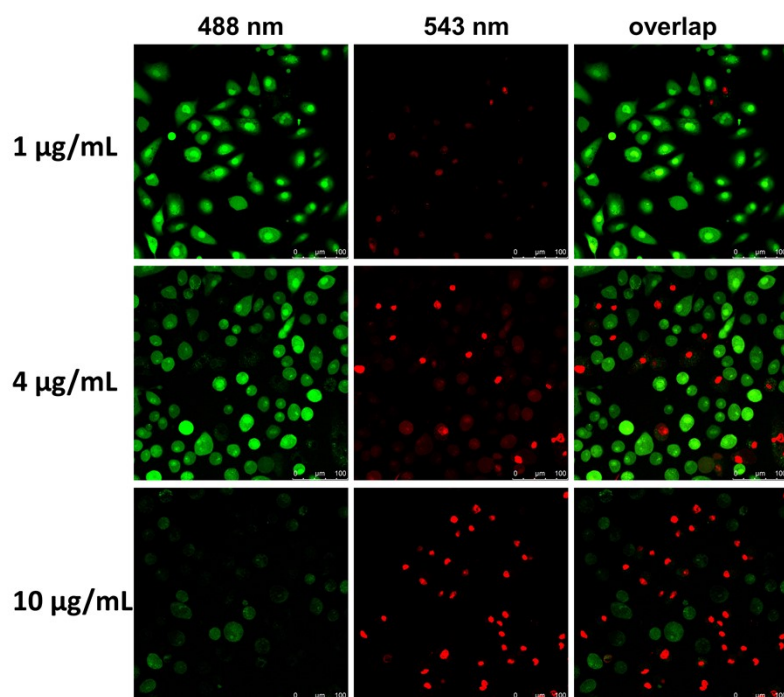

Fig. S8 CLSM images of HeLa cells after co-incubation with  $\text{Fe}_3\text{O}_4/\text{GOx-PLGA}$  nanocomposite under acidic ( $\text{pH} = 6.0$ ) conditions at varied concentrations for 6 h
